# Supplementary material for: Urban wastewater analysis as an effective tool for monitoring illegal drugs, including new psychoactive substances, in the Eastern European region
Source: PubMed Central journal article supplement (PMC7078280; doi:10.1038/s41598-020-61628-5), 2020-03-17
Supplement: 41598_2020_61628_MOESM1_ESM.pdf [file 41598_2020_61628_MOESM1_ESM.pdf]

**Urban wastewater analysis as an effective tool for monitoring illegal drugs, including new psychoactive substances, in the Eastern European region.**

Anna M. Sulej-Suchomska<sup>a\*</sup>, Agnieszka Klupczynska<sup>b</sup>, Paweł Derezinski<sup>b</sup>, Jan Matysiak<sup>b</sup>, Piotr Przybyłowski<sup>a</sup>, Zenon J. Kokot<sup>b</sup>

**Figure Legends**

**Fig. 1** Schematic representation of the analytical procedure for the determination of illicit drugs in wastewater samples by using an SPE-HPLC-MS/MS-based system

**Fig. 2** The concentrations of drugs of abuse in wastewater samples collected at a WWTP in Poznań (Poland) in autumn 2015

**Fig. 3** The concentrations of illicit drugs in wastewater samples collected at a WWTP in Poznań (Poland) in spring 2016

**Supplementary Information**

**Fig. S1** Extracted ion chromatograms of a standard solution of drugs of abuse acquired in MRM acquisition mode

**Fig. S2** Chromatograms of wastewater samples collected at a WWTP in Poland on March 21, 2016 and analysed by using an SPE-HPLC-MS/MS-based procedure
