# Supplementary material for: Urban wastewater analysis as an effective tool for monitoring illegal drugs, including new psychoactive substances, in the Eastern European region
Source: PubMed Central journal article supplement (PMC7078280; doi:10.1038/s41598-020-61628-5), 2020-03-17

# Urban wastewater analysis as an effective tool for monitoring illegal drugs, including new psychoactive substances, in the Eastern European region.

Anna M. Sulej-Suchomska<sup>a\*</sup>, Agnieszka Klupczynska<sup>b</sup>, Paweł Derezinski<sup>b</sup>, Jan Matysiak<sup>b</sup>, Piotr Przybyłowski<sup>a</sup>, Zenon J. Kokot<sup>b</sup>

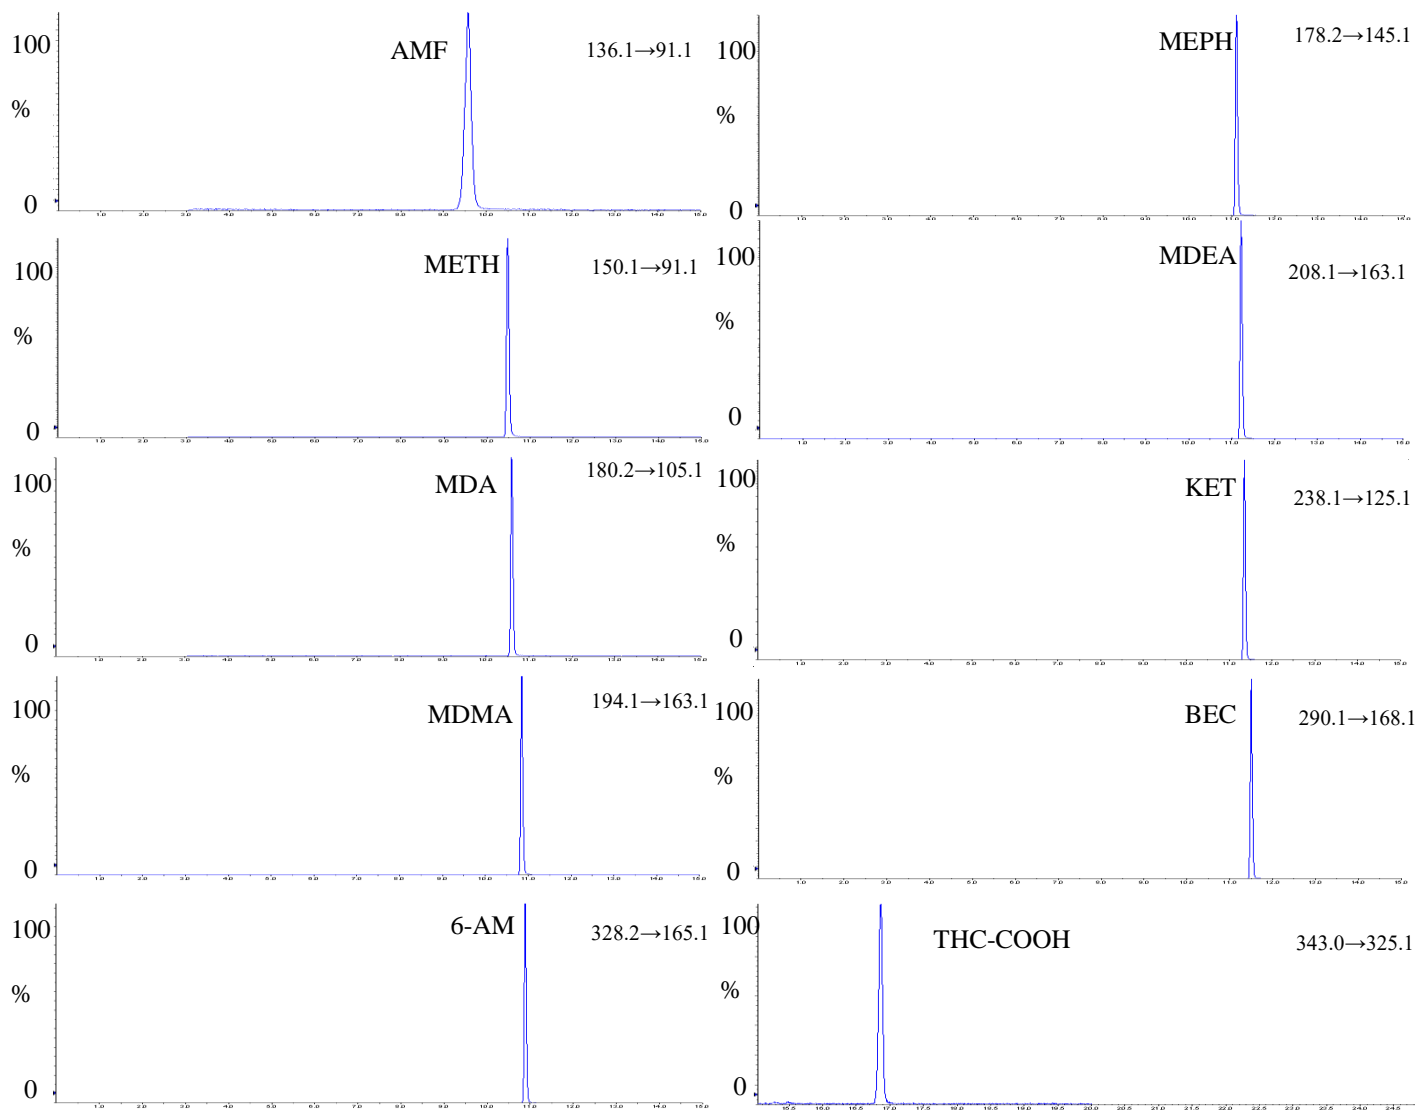

Supplement: 41598_2020_61628_MOESM2_ESM.pdf [file 41598_2020_61628_MOESM2_ESM.pdf]
